# Supplementary material
Source: ML conference proceedings conference paper supplement (https://openaccess.thecvf.com/content/CVPR2026/html/Wu_MeToM_Metadata-Guided_Token_CVPR_2026_paper.html)
Supplement: Supplementary file 1 [file Wu_MeToM_Metadata-Guided_Token_CVPR_2026_supplemental.pdf]

# MeToM: Metadata-Guided Token Merging for Efficient Video LLMs

## Supplementary Material

### A. Ablation Study

**Ablation study on merging modules.** To verify the effectiveness of each component in MeToM, we conduct an ablation study on LLaVA-OneVision-7B [10], as summarized in Table 5. **RPM** merges tokens with low information density during the tokenization stage, reducing computational costs while ensuring performance. **BTM** leverages spatiotemporal information density to compress tokens, greatly reducing the computational burden. Finally, the synergy of **RPM**, **BTM**, and **MATM** achieves the optimal trade-off between efficiency and accuracy.

Table 5. Ablation study results of the main components of MeToM on VideoMME and NEXT-QA benchmarks.

| RPM | BTM | MATM | VideoMME     |             |             | NEXT-QA      |             |             |
|-----|-----|------|--------------|-------------|-------------|--------------|-------------|-------------|
|     |     |      | R.Acc. ↑     | R.TTFT ↓    | R.Nv ↓      | R.Acc. ↑     | R.TTFT ↓    | R.Nv ↓      |
| ✓   | ✗   | ✗    | 101.4        | 79.1        | 75.0        | <b>100.2</b> | 84.5        | 75.0        |
| ✗   | ✓   | ✗    | 98.2         | 53.9        | 50.4        | 98.9         | 50.4        | 49.7        |
| ✓   | ✓   | ✗    | 100.8        | 38.2        | 28.0        | 99.3         | 40.6        | 29.2        |
|     | ✓   | ✓    | <b>102.7</b> | <b>27.8</b> | <b>28.0</b> | 99.1         | <b>32.5</b> | <b>29.2</b> |

**Ablation study on RPM.** We investigate the impact of the merging threshold  $\tau$  defined in Eqn.(8) of the main paper, which governs the sensitivity of RPM in identifying low-information regions. A higher  $\tau$  encourages more aggressive merging of spatial tokens, whereas a lower  $\tau$  preserves more fine-grained details. To determine the optimal setting, we conduct an ablation study by varying  $\tau$  from 0.15 to 0.35 on the VideoMME and NEXT-QA benchmarks.

As illustrated in Fig. 5, the model maintains robust performance when  $\tau \leq 0.25$ . However, setting  $\tau > 0.25$  leads to a sharp decline in accuracy across both benchmarks, indicating that overly aggressive merging begins to discard semantically meaningful visual cues. Conversely, while reducing  $\tau$  below 0.25 preserves more tokens, it yields negligible performance gains while increasing the computational overhead. Therefore, we empirically set  $\tau = 0.25$  as the default configuration to achieve the optimal trade-off between inference efficiency and model performance.

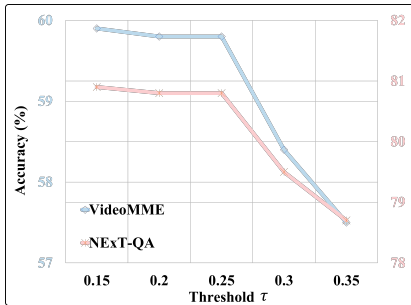

Figure 5. Ablation study on the merging threshold  $\tau$  of RPM.

**Ablation study on MATM.** We conduct comprehensive ablation studies to determine the optimal configuration for the Multi-Layer Attention-Guided Token Merging (MATM) module, specifically investigating the **insertion layer** and the **pruning ratio**.

Table 6 compares the performance of inserting MATM at different layers  $L$  of the LLM. Inserting MATM at an early stage (Layer 1) yields sub-optimal accuracy (99.1%). This is primarily attributed to the unstable attention score in the initial layers, where visual tokens have not yet sufficiently interacted with the textual context. Conversely, deploying MATM at a deeper layer (Layer 7) fails to deliver significant efficiency gains (43.7% TTFT), as the preceding layers still process the full token sequence. Consequently, **Layer 3** emerges as the optimal choice, achieving the highest accuracy (102.7% on VideoMME) while maintaining a low latency (27.8%). We adopt  $L = 3$  as the default setting to balance inference efficiency and model performance.

Table 6. Ablation study on the MATM insertion layers  $L$ . The best result is in bold, second best underlined.

| LLM Layer | VideoMME     |             | NEXT-QA     |             |
|-----------|--------------|-------------|-------------|-------------|
|           | R.Acc. ↑     | R.TTFT ↓    | R.Acc. ↑    | R.TTFT ↓    |
| 1         | 99.1         | <b>27.2</b> | 98.8        | <b>31.8</b> |
| 3         | <b>102.7</b> | <u>27.8</u> | 99.1        | <u>32.5</u> |
| 7         | <u>100.5</u> | 43.7        | <b>99.2</b> | 48.1        |

We further explore the impact of the visual token pruning ratio  $R\%$  in MATM, as shown in Fig. 6. The results indicate that the model maintains acceptable performance as the pruning ratio increases from 20% to 60%. However, increasing the ratio beyond 50% (e.g., to 60%) triggers a sharp decline in accuracy, suggesting that critical visual information is being discarded. To maximize inference efficiency without suffering a catastrophic performance loss, we identify 50% as the optimal trade-off point. Therefore, we set the pruning ratio  $R\%$  to 50%.

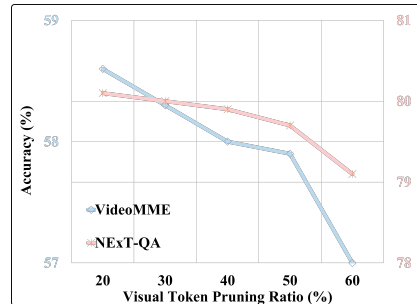

Figure 6. Ablation study on the visual token pruning ratio  $R\%$  of MATM.

## B. Supplementary Experimental Data

In the main paper, we reported relative performance metrics (normalized to the 100% token budget baseline) in Tables 1, 2, 3, and 4 in the main paper to highlight efficiency trade-offs. To provide a comprehensive view of the actual computational costs, we present the corresponding absolute values for Accuracy, Time-To-First-Token (TTFT), and visual token counts ( $N_V$ ) in this section. Specifically, the absolute results for LLaVA-OneVision-7B [10], LLaVA-Video-7B [37], Qwen2VL-7B [1], and LLaVA-Video-72B [37] are provided in Tables 7, 8, 9, and 10, respectively.

## C. Supplementary Visualizations

To provide a comprehensive qualitative analysis, we present additional visualization examples in this section. As illustrated in the following Figs. 7 and 8, we visualize the effect of our token merging strategy. The middle row displays the spatial information density cues derived from codec metadata. Guided by these cues, MeToM aggressively merges redundant tokens in background areas (visualized as blank blocks in the bottom row) while strictly preserving critical details in the foreground.

## D. Limitations and Future Work

MeToM effectively reduces computational costs by leveraging codec metadata. However, relying on such heuristics may occasionally misalign with semantic importance. Furthermore, the substantial size of the LLM backbone poses challenges for deployment on resource-constrained devices. To address this, future work will explore combining MeToM with model compression techniques, such as quantization.

## E. Broader Impacts

MeToM significantly enhances the efficiency of Video LLMs by leveraging intrinsic codec metadata for training-free token reduction. By mitigating the heavy computational burden, our framework improves the accessibility of advanced video understanding models and contributes to more sustainable, energy-efficient AI systems.

Table 7. Comparison of training-free token reduction methods using LLaVA-OneVision-7B. The **best** result is in bold, second best underlined.

| Token Budget | Method             | VideoMME    |              |                  | LongVideoBench |              |                  | MLVU        |              |                  | EgoSchema   |              |                  | NExT-QA     |              |                  | Avg.        |              |                  |
|--------------|--------------------|-------------|--------------|------------------|----------------|--------------|------------------|-------------|--------------|------------------|-------------|--------------|------------------|-------------|--------------|------------------|-------------|--------------|------------------|
|              |                    | Acc ↑       | TTFT ↓       | N <sub>V</sub> ↓ | Acc ↑          | TTFT ↓       | N <sub>V</sub> ↓ | Acc ↑       | TTFT ↓       | N <sub>V</sub> ↓ | Acc ↑       | TTFT ↓       | N <sub>V</sub> ↓ | Acc ↑       | TTFT ↓       | N <sub>V</sub> ↓ | Acc ↑       | TTFT ↓       | N <sub>V</sub> ↓ |
| 100%         | <i>LLaVA-OV 7B</i> | 59.0        | 1.904        | 22086            | 56.3           | 1.712        | 19624            | 67.5        | 2.224        | 25088            | 61.3        | 2.216        | 25069            | 80.6        | 0.630        | 8116             | 64.9        | 1.737        | 19997            |
| 50%          | + FastV            | 58.4        | 0.934        | 11043            | 56.2           | 0.842        | 9812             | 67.4        | 1.071        | 12544            | 61.0        | 1.080        | 12535            | 80.2        | 0.330        | 4058             | 64.6        | 0.851        | 9998             |
|              | + ToMe             | 59.8        | 0.963        | 11043            | 57.7           | 0.865        | 9812             | 68.8        | 1.101        | 12544            | <u>62.3</u> | 1.108        | 12535            | 80.1        | 0.343        | 4058             | 65.7        | 0.876        | 9998             |
|              | + DyCoke           | 60.1        | 0.831        | 10555            | <b>57.9</b>    | <u>0.740</u> | 9393             | 68.7        | <u>0.941</u> | 11978            | 61.8        | <u>0.948</u> | 11969            | 80.4        | <u>0.301</u> | 3957             | 65.8        | <u>0.752</u> | 9570             |
|              | + STTM             | <b>60.7</b> | <u>0.773</u> | <b>8579</b>      | 57.7           | 0.804        | <b>9011</b>      | <u>69.7</u> | 1.020        | <b>11692</b>     | 61.7        | 0.972        | <b>10944</b>     | <u>80.5</u> | 0.312        | <b>3628</b>      | <u>66.1</u> | 0.776        | <b>8771</b>      |
|              | + HoliTom          | 59.8        | 0.889        | 9642             | 56.8           | 0.796        | 9304             | 68.4        | 1.007        | 11821            | 61.2        | 1.012        | 11812            | 79.9        | 0.316        | 3824             | 65.2        | 0.804        | 9281             |
|              | + Ours             | <u>60.6</u> | <b>0.718</b> | <u>9520</u>      | <u>57.8</u>    | <b>0.706</b> | <u>9129</u>      | <b>69.9</b> | <b>0.936</b> | <u>11760</u>     | <b>62.4</b> | <b>0.943</b> | <u>11751</u>     | <b>80.6</b> | <b>0.298</b> | <u>3794</u>      | <b>66.3</b> | <b>0.720</b> | <u>9191</u>      |
| 30%          | + FastV            | 58.1        | 0.597        | 6626             | 55.3           | 0.543        | <u>5887</u>      | 65.6        | 0.681        | <u>7526</u>      | 60.9        | 0.694        | 7520             | 79.6        | 0.218        | 2435             | 63.9        | 0.547        | 5999             |
|              | + ToMe             | <u>59.8</u> | 0.649        | 6626             | 56.5           | 0.587        | 5888             | <b>69.1</b> | 0.740        | 7527             | <u>62.1</u> | 0.750        | 7521             | 79.5        | 0.240        | 2436             | 65.4        | 0.593        | 6000             |
|              | + DyCoke           | <u>59.8</u> | <u>0.537</u> | 6878             | 55.9           | <u>0.488</u> | 6131             | 68.3        | <u>0.598</u> | 7798             | <u>62.1</u> | 0.607        | 7792             | <u>79.7</u> | <u>0.208</u> | 2631             | 65.2        | <u>0.488</u> | 6246             |
|              | + STTM             | <b>60.6</b> | 0.601        | <u>6264</u>      | <u>56.6</u>    | 0.570        | 6022             | 68.4        | 0.735        | 7989             | 61.8        | <u>0.570</u> | <b>5621</b>      | <u>79.7</u> | 0.240        | 2577             | 65.4        | 0.543        | <b>5695</b>      |
|              | + HoliTom          | 59.6        | 0.569        | 6511             | 55.6           | 0.519        | 6076             | 68.0        | 0.642        | 7566             | 60.7        | 0.653        | 7560             | 79.4        | 0.213        | <u>2387</u>      | 64.7        | 0.519        | 6020             |
|              | + Ours             | <b>60.6</b> | <b>0.529</b> | <b>6190</b>      | <b>56.8</b>    | <b>0.482</b> | <b>5854</b>      | <u>69.0</u> | <b>0.592</b> | <b>7488</b>      | <b>62.3</b> | <b>0.566</b> | <u>7482</u>      | <b>79.9</b> | <b>0.205</b> | <b>2368</b>      | <b>65.7</b> | <b>0.475</b> | <u>5876</u>      |

Table 8. Comparison of training-free token reduction methods using LLaVA-Video-7B under 50% and 30% token budgets. The **best** result is in bold, second best underlined.

| Token Budget | Method                | VideoMME    |              |                  | LongVideoBench |              |                  | MLVU        |              |                  | EgoSchema   |              |                  | NExT-QA     |              |                  | Avg.        |              |                  |
|--------------|-----------------------|-------------|--------------|------------------|----------------|--------------|------------------|-------------|--------------|------------------|-------------|--------------|------------------|-------------|--------------|------------------|-------------|--------------|------------------|
|              |                       | Acc ↑       | TTFT ↓       | N <sub>V</sub> ↓ | Acc ↑          | TTFT ↓       | N <sub>V</sub> ↓ | Acc ↑       | TTFT ↓       | N <sub>V</sub> ↓ | Acc ↑       | TTFT ↓       | N <sub>V</sub> ↓ | Acc ↑       | TTFT ↓       | N <sub>V</sub> ↓ | Acc ↑       | TTFT ↓       | N <sub>V</sub> ↓ |
| 100%         | <i>LLaVA-Video 7B</i> | 63.1        | 2.039        | 22086            | 59.6           | 1.805        | 19624            | 70.9        | 2.343        | 25088            | 58.7        | 2.312        | 25069            | 82.9        | 0.659        | 8116             | 67.0        | 1.832        | 19997            |
| 50%          | + FastV               | 61.0        | 1.034        | 11043            | 57.4           | 0.918        | 9812             | 68.3        | 1.164        | 12544            | 57.6        | 1.166        | 12535            | 82.4        | 0.353        | 4058             | 65.3        | 0.927        | 9998             |
|              | + ToMe                | 61.4        | 1.043        | 11043            | 58.0           | 0.949        | 9812             | 69.7        | 1.192        | 12544            | <b>58.7</b> | 1.199        | 12535            | <u>82.6</u> | 0.370        | 4058             | 66.1        | 0.951        | 9998             |
|              | + DyCoke              | 61.5        | <u>0.912</u> | 10555            | 58.1           | <u>0.820</u> | 9393             | 69.5        | <u>1.046</u> | 11978            | <u>58.6</u> | 1.049        | 11969            | 82.1        | 0.330        | 3957             | 66.0        | <u>0.831</u> | 9570             |
|              | + STTM                | <u>62.6</u> | 1.021        | 10771            | <u>59.6</u>    | 0.895        | 9183             | 69.9        | 1.152        | 12187            | <u>58.6</u> | <u>1.045</u> | <b>10737</b>     | 82.5        | <u>0.322</u> | <b>3452</b>      | 66.6        | 0.887        | 9266             |
|              | + HoliTom             | 62.1        | 0.973        | <u>9642</u>      | 59.2           | 0.872        | 9304             | <u>70.2</u> | 1.104        | <u>11821</u>     | 57.7        | 1.105        | 11812            | 82.2        | 0.342        | 3824             | 66.3        | 0.879        | 9281             |
|              | + Ours                | <b>62.9</b> | <b>0.905</b> | <b>9520</b>      | <b>59.8</b>    | <b>0.815</b> | <b>9129</b>      | <b>70.4</b> | <b>1.038</b> | <b>11760</b>     | <b>58.7</b> | <b>1.041</b> | <u>11751</u>     | <b>82.7</b> | <b>0.318</b> | <u>3794</u>      | <b>66.9</b> | <b>0.823</b> | <b>9191</b>      |
| 30%          | + FastV               | 59.2        | 0.683        | 6626             | 54.7           | 0.610        | 5887             | <u>69.3</u> | 1.620        | 7562             | 56.9        | 0.771        | 7520             | 81.6        | 0.240        | 2435             | 64.3        | 0.785        | 6006             |
|              | + ToMe                | 59.2        | 0.720        | 6626             | 56.3           | 0.658        | 5888             | 67.0        | 0.821        | 7527             | 57.4        | 0.834        | 7521             | 81.6        | 0.265        | 2436             | 64.3        | 0.660        | 6000             |
|              | + DyCoke              | 60.7        | <u>0.598</u> | 6878             | 57.1           | <u>0.544</u> | 6131             | 67.3        | <b>0.684</b> | 7798             | <b>58.3</b> | <u>0.693</u> | 7792             | 81.5        | <u>0.229</u> | 2631             | 65.0        | <u>0.550</u> | 6246             |
|              | + STTM                | <u>62.3</u> | 0.640        | <b>5929</b>      | 57.0           | 0.616        | <b>5702</b>      | 68.5        | 0.769        | <b>7337</b>      | 58.0        | 0.773        | <b>7285</b>      | <b>82.0</b> | 0.235        | <b>2168</b>      | 65.6        | 0.607        | <b>5684</b>      |
|              | + HoliTom             | 61.3        | 0.641        | 6511             | <u>57.9</u>    | 0.579        | 6076             | 68.1        | 0.734        | 7566             | 57.6        | 0.726        | 7560             | 81.5        | 0.235        | 2387             | 65.3        | 0.583        | 6020             |
|              | + Ours                | <b>62.5</b> | <b>0.592</b> | <u>6190</u>      | <b>58.1</b>    | <b>0.539</b> | <u>5854</u>      | <b>69.4</b> | 0.688        | 7488             | <u>58.1</u> | <b>0.676</b> | <u>7482</u>      | <u>81.9</u> | <b>0.226</b> | <u>2368</u>      | <b>66.0</b> | <b>0.544</b> | <u>5876</u>      |

Table 9. Comparison using Qwen2VL-7B. The **best** result is in bold, second best underlined. **DyCoke\*** denotes the DyCoke-stage1 setting.

| Token Budget | Method            | VideoMME    |              |                  | LongVideoBench |              |                  | Avg.        |              |                  |
|--------------|-------------------|-------------|--------------|------------------|----------------|--------------|------------------|-------------|--------------|------------------|
|              |                   | Acc ↑       | TTFT ↓       | N <sub>V</sub> ↓ | Acc ↑          | TTFT ↓       | N <sub>V</sub> ↓ | Acc ↑       | TTFT ↓       | N <sub>V</sub> ↓ |
| 100%         | <i>Qwen2VL 7B</i> | 61.8        | 10.745       | 74982            | 56.8           | 10.597       | 72109            | 59.3        | 10.671       | 73546            |
| 50%          | + ToMe            | 61.9        | 4.509        | 37491            | 56.7           | 4.348        | 36054            | 59.3        | 4.429        | 36773            |
|              | + DyCoke*         | 62.6        | 4.166        | <b>36057</b>     | <u>57.5</u>    | 4.148        | <u>34735</u>     | 60.1        | <u>4.157</u> | <u>35396</u>     |
|              | + STTM            | <b>62.9</b> | 4.761        | 39217            | 57.4           | 4.610        | 37315            | <u>60.2</u> | 4.686        | 38266            |
|              | + Ours            | <u>62.7</u> | <b>4.096</b> | <u>36540</u>     | <b>57.8</b>    | <b>4.092</b> | <b>34220</b>     | <b>60.3</b> | <b>4.094</b> | <b>35380</b>     |
| 30%          | + ToMe            | 61.4        | 2.835        | <u>22496</u>     | 54.7           | 2.600        | 21633            | 58.1        | 2.718        | 22065            |
|              | + DyCoke*         | 61.8        | <u>2.710</u> | 23479            | <u>57.5</u>    | 2.694        | <u>22649</u>     | <u>59.7</u> | 2.702        | 23064            |
|              | + STTM            | 62.4        | 2.766        | 23143            | 56.9           | 2.472        | <u>20022</u>     | <u>59.7</u> | 2.619        | 21583            |
|              | + Ours            | <b>62.6</b> | <b>2.624</b> | <b>21980</b>     | <b>57.6</b>    | <b>2.430</b> | <b>19750</b>     | <b>60.1</b> | <b>2.527</b> | <b>20865</b>     |

Table 10. Comparison using LLaVA-Video-72B. The **best** result is in bold, second best underlined. **DyCoke\*** denotes the DyCoke-stage1 setting.

| Token Budget | Method                 | VideoMME    |              |                  |
|--------------|------------------------|-------------|--------------|------------------|
|              |                        | Acc ↑       | TTFT ↓       | N <sub>V</sub> ↓ |
| 100%         | <i>LLaVA-Video 72B</i> | 70.5        | 17.698       | 22086            |
| 50%          | + ToMe                 | 70.6        | 8.424        | 11043            |
|              | + DyCoke*              | 70.4        | 8.052        | 10555            |
|              | + STTM                 | <u>71.4</u> | <u>7.821</u> | <u>10082</u>     |
|              | + Ours                 | <b>71.5</b> | <b>7.420</b> | <b>9520</b>      |
| 30%          | + ToMe                 | 68.5        | 5.186        | 6626             |
|              | + DyCoke*              | <u>69.3</u> | 5.353        | 6878             |
|              | + STTM                 | <b>69.9</b> | 5.405        | 6897             |
|              | + Ours                 | <b>69.9</b> | <b>5.022</b> | <b>6190</b>      |

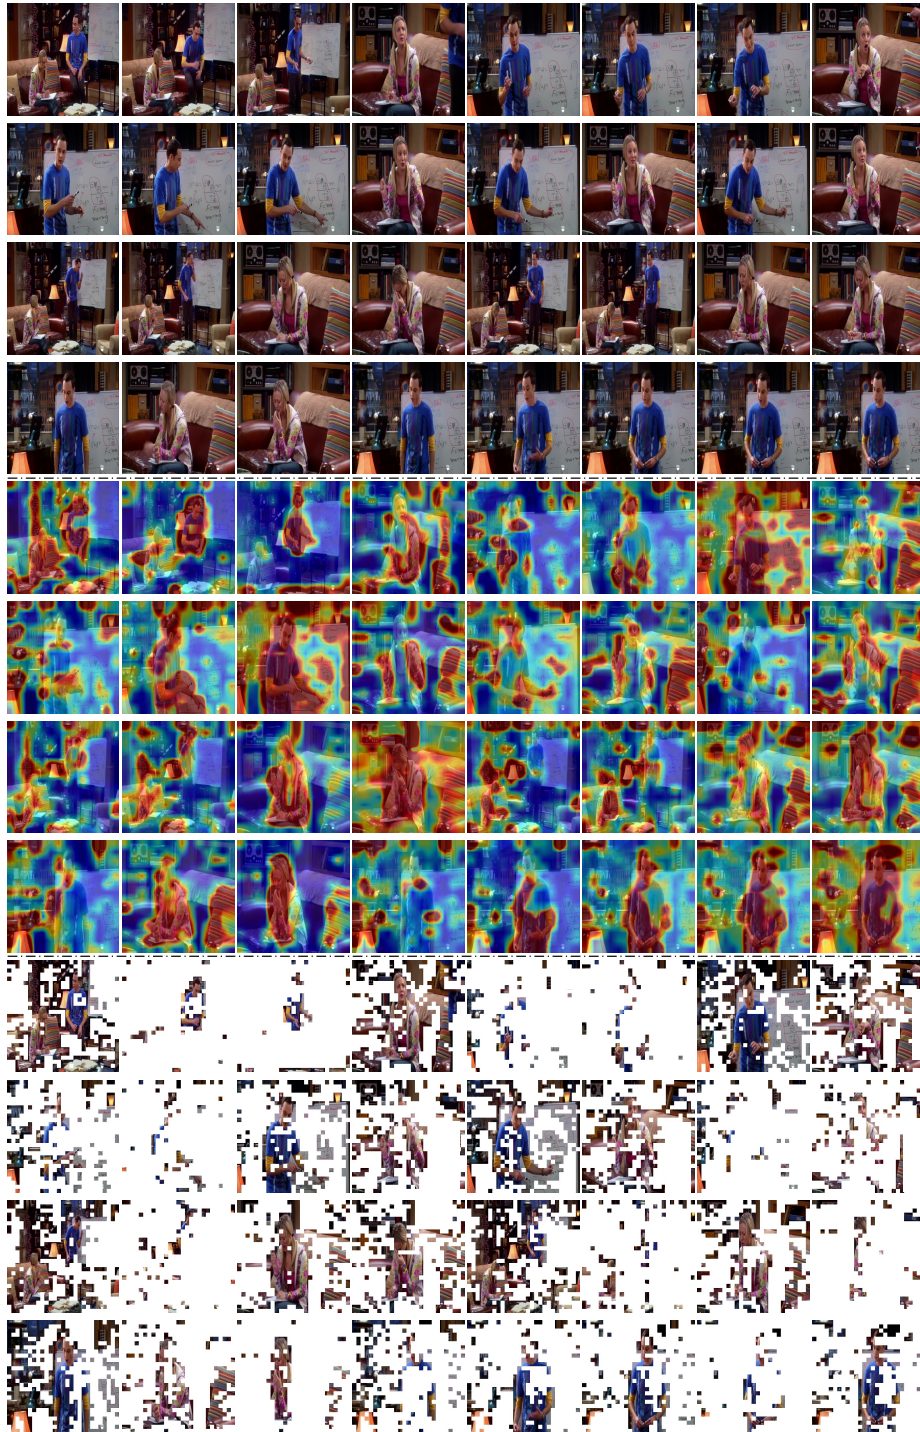

Figure 7. Visualization of token merging. Top: Frames of the input video. Middle: Residual energy maps derived from metadata. Bottom: Video frames after token merging, where merged tokens are visualized as blank blocks.

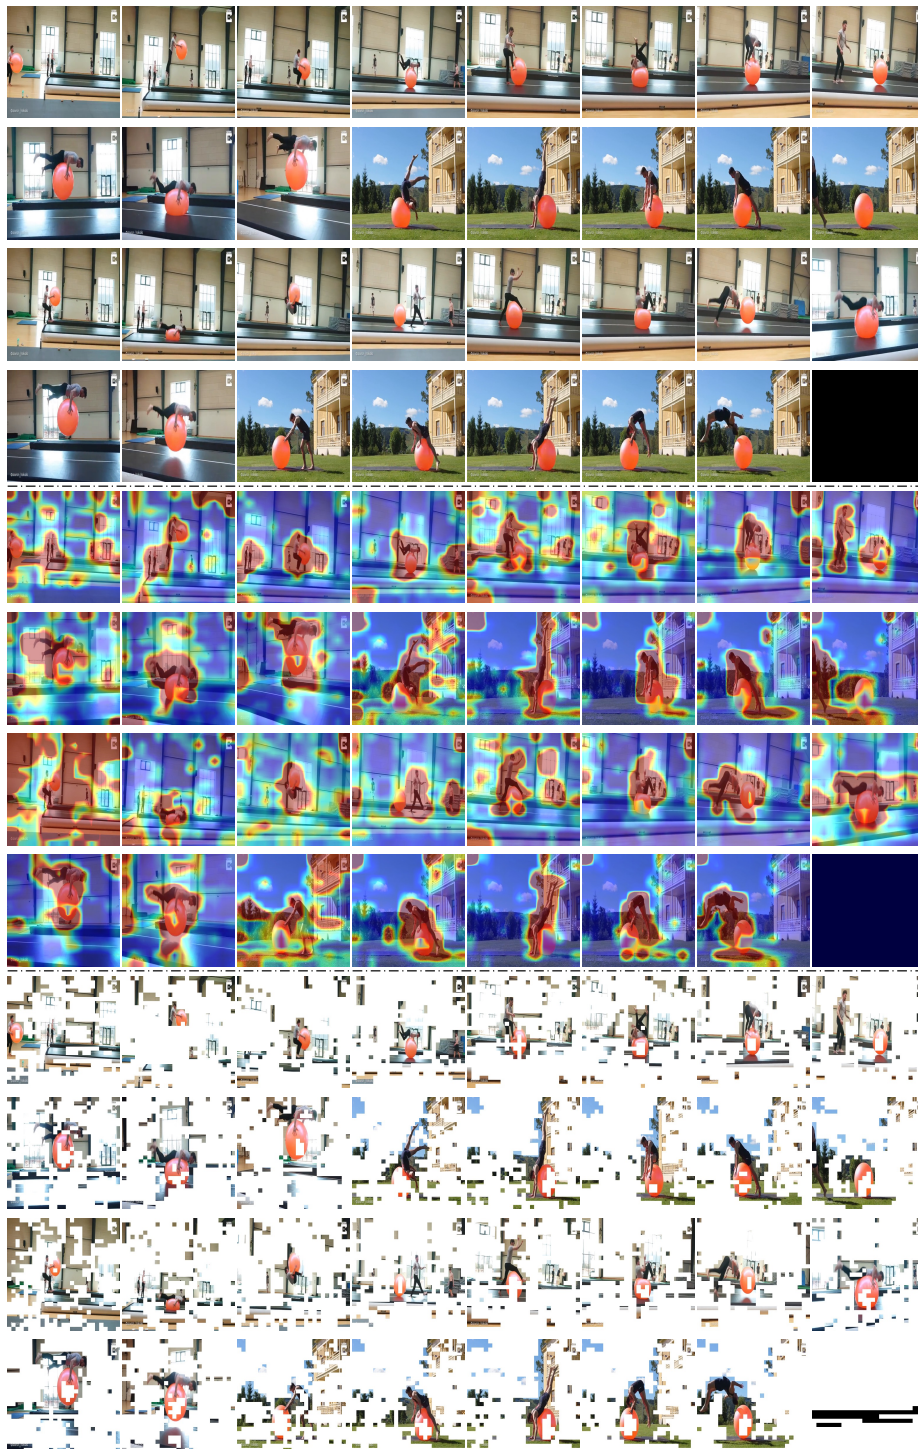

Figure 8. Visualization of token merging. Top: Frames of the input video. Middle: Residual energy maps derived from metadata. Bottom: Video frames after token merging, where merged tokens are visualized as blank blocks.
